# Supplementary material for: Platelets convert peripheral blood circulating monocytes to regulatory cells via immunoglobulin G and activating-type Fcγ receptors
Source: Springer Nature journal article supplement (doi:10.1186/s12865-015-0086-z), 2015-04-20
Supplement: MOESM1 [file 9736118]

### Supplementary Table I

Specificities and isotypes of monoclonal IgG antibodies used for IGPS or its blocking in this study

| mAb               | Specificity               | IgG isotype |
|-------------------|---------------------------|-------------|
| anti-CD61 (#33)   | human CD61                | mIgG2a      |
| anti-CD61 (6E4)   | human/mouse CD61          | mIgG2a      |
| anti-CD41 (HIP8)  | human CD41                | mIgG1       |
| anti-CD42b (HIP1) | human CD42b               | mIgG1       |
| anti-CD9 (HI9a)   | human CD9                 | mIgG1       |
| anti-CD36 (5-271) | human CD36                | mIgG2a      |
| IV.3              | human Fc $\gamma$ RIIA/B  | mIgG2b      |
| 3G8               | human Fc $\gamma$ RIIIA/B | mIgG1       |

Supplementary Figure S1

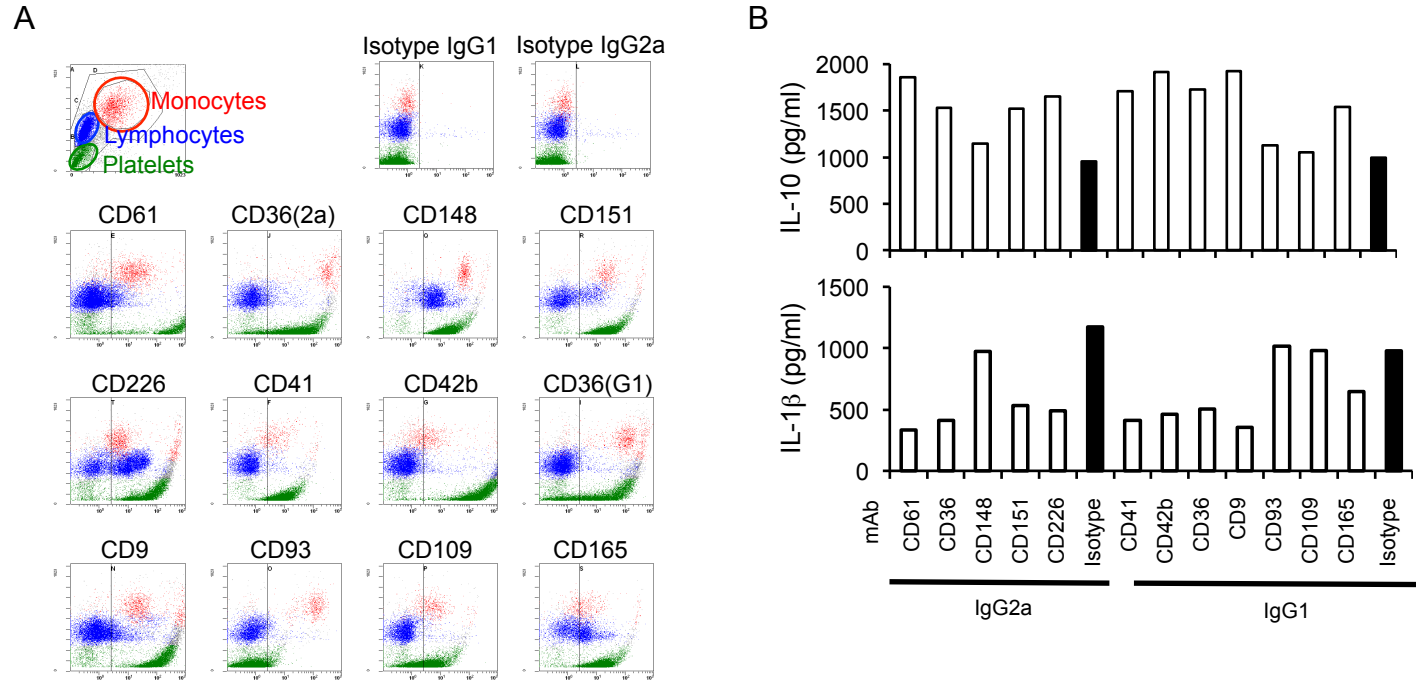

**C**

| CD number | Alternative name or protein family | FCM reactivity         |                        | Cytokine modulation |
|-----------|------------------------------------|------------------------|------------------------|---------------------|
|           |                                    | Platelets <sup>a</sup> | Monocytes <sup>b</sup> |                     |
| CD41      | GPIIb (Integrin $\alpha$ IIb)      | +                      | +                      | +                   |
| CD61      | GPIIIa (Integrin $\beta$ 3)        | ++                     | +                      | +                   |
| CD42b     | GPIb $\alpha$                      | ++                     | $\pm$                  | +                   |
| CD36      | GPIIIb/IV                          | ++                     | +                      | +                   |
| CD9       | p24, tetraspan family              | ++                     | +                      | +                   |
| CD93      | Transmembrane protein              | -                      | +                      | -                   |
| CD109     | GPI-anchored protein               | +                      | $\pm$                  | -                   |
| CD148     | Membrane Tyr phosphatase           | +                      | +                      | $\pm$               |
| CD151     | Tetraspan family protein           | +                      | +                      | $\pm$               |
| CD165     | AD2                                | +                      | $\pm$                  | $\pm$               |
| CD226     | DNAM-1                             | ++                     | +                      | +                   |

<sup>a</sup>Flow cytometry reactivity of IgG to platelets based on results in panel C.

<sup>b</sup>Flow cytometry reactivity of IgG to monocytes based on results in panel C.

**FIGURE S1. Platelet-reactive IgG antibodies can evoke IGPC.**

**(A–C)** Antibodies binding avidly to platelets can augment IL-10 release and reduce IL-1 $\beta$ . Using a whole PMBC preparation, the binding activity of each mAb as to platelets was assessed by flow cytometry **(A)**. Cytokine modulation by mAbs was compared **(B)**, and the results were summarized **(C)**. Cytokine modulation roughly correlated with flow cytometric reactivity of mAbs to platelets.

Supplementary Figure S2

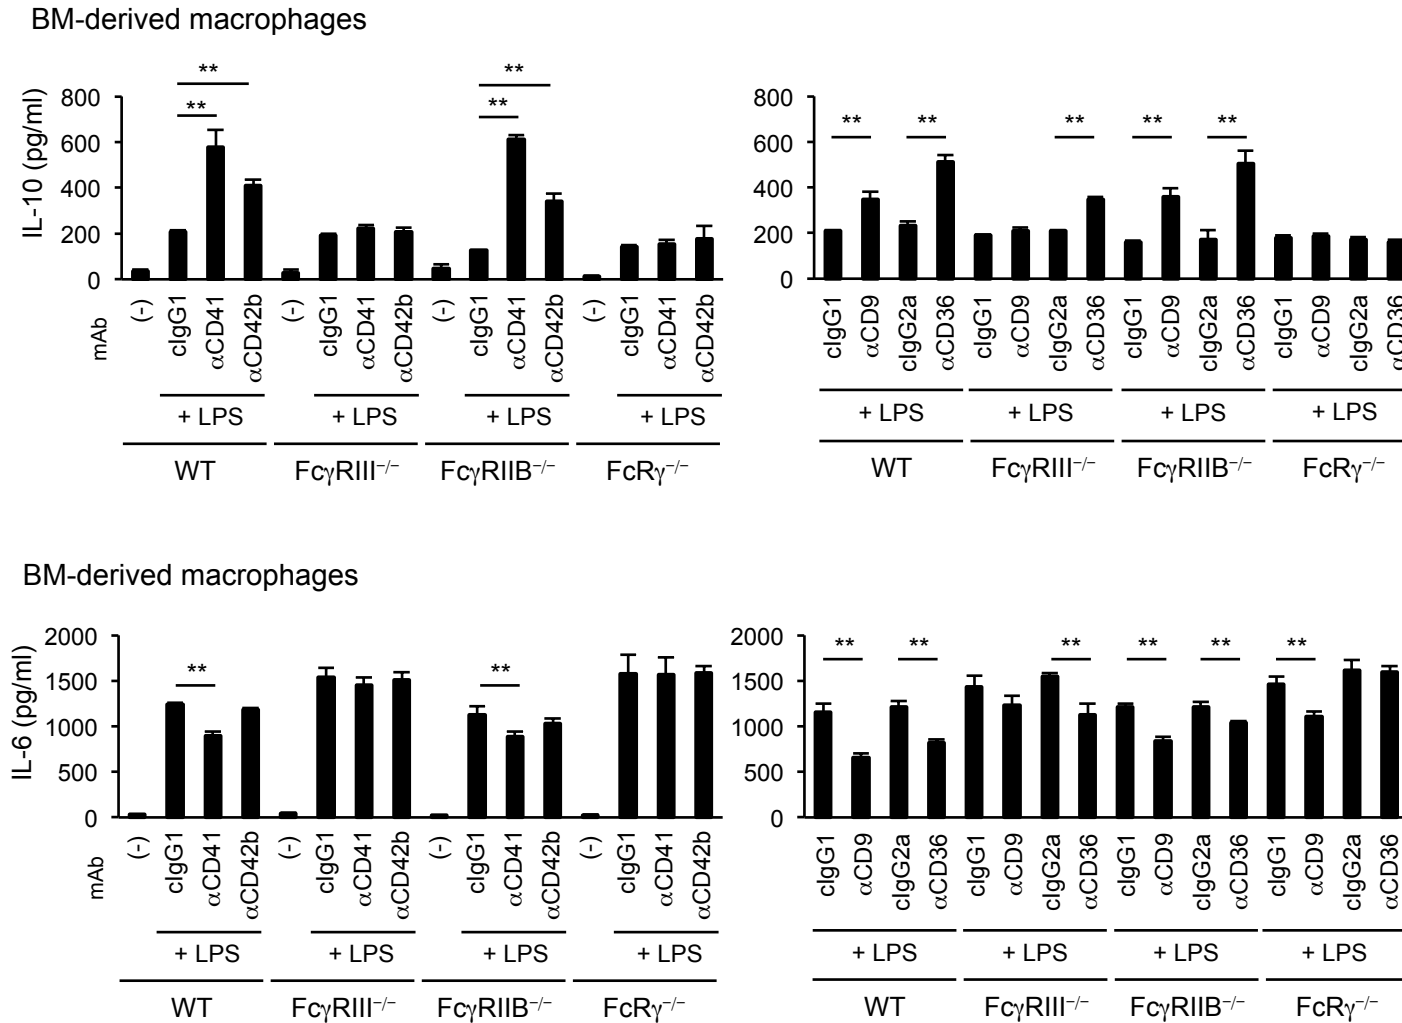

**FIGURE S2. Indispensable FcR $\gamma$  but not Fc $\gamma$ RIIB, and the isotype-dependent nature of IGPC.**

Bone marrow (BM)-derived cultured macrophages from wild-type (WT), Fc $\gamma$ RIII<sup>-/-</sup>, Fc $\gamma$ RIIB<sup>-/-</sup> or FcR $\gamma$ <sup>-/-</sup> mice were treated with an anti-human CD41 or CD42b, or anti-human CD9 mAb (isotype, IgG1) or anti-human CD36 mAb (IgG2a), and then stimulated with LPS in the presence of human platelets. The IL-10 (upper) and IL-6 (lower) levels in the culture supernatants were measured after 24 h. Data are shown as means for triplicate samples  $\pm$  SEM. The results are representative of more than three independent experiments with similar results. \*\*,  $P < 0.01$ .
